# Supplementary material
Source: publisher site journal article supplement (https://static.cambridge.org/content/id/urn:cambridge.org:id:article:S1138741621000317/resource/name/S1138741621000317supp001.docx)
Supplement: Supplementary file 1 [file S1138741621000317supp001.docx]

<H1> Supplemental Material

<H2> *Complete Semantic Differential Evaluation with all Items and Dimensions for the Compassion Construct*

|  | **1**  **Very** | **2**  **Moderately** | **3**  **Slightly** | **4**  **Neither one**  **nor the other** | **5**  **Slightly** | **6**  **Moderately** | **7**  **Very** |  |
| --- | --- | --- | --- | --- | --- | --- | --- | --- |
| Evaluative Dimension |  |  |  |  |  |  |  |  |
| Loving |  |  |  |  |  |  |  | Hateful |
| Sensitive |  |  |  |  |  |  |  | Insensitive |
| Relaxed |  |  |  |  |  |  |  | Tense |
| Grateful |  |  |  |  |  |  |  | Ungrateful |
| Friendly |  |  |  |  |  |  |  | Unfriendly |
| Optimistic |  |  |  |  |  |  |  | Pessimistic |
| Cheerful |  |  |  |  |  |  |  | Sad |
| Kind |  |  |  |  |  |  |  | Unkind |
| Satisfied |  |  |  |  |  |  |  | Dissatisfied |
| Empathic |  |  |  |  |  |  |  | Non-empathic |
| Generous |  |  |  |  |  |  |  | Selfish |
| Sincere |  |  |  |  |  |  |  | Hypocritical |
| Potency Dimension |  |  |  |  |  |  |  |  |
| Strong |  |  |  |  |  |  |  | Weak |
| Admirable |  |  |  |  |  |  |  | Deplorable |
| Big |  |  |  |  |  |  |  | Small |
| Brave |  |  |  |  |  |  |  | Cowardly |
| Merciful |  |  |  |  |  |  |  | Ruthless |
| Perfect |  |  |  |  |  |  |  | Imperfect |
| Rested |  |  |  |  |  |  |  | Tired |
| Powerful |  |  |  |  |  |  |  | Powerless |
| Intelligent |  |  |  |  |  |  |  | Unintelligent |
| Healthy |  |  |  |  |  |  |  | Sick |
| Activity Dimension |  |  |  |  |  |  |  |  |
| Young |  |  |  |  |  |  |  | Old |
| Active |  |  |  |  |  |  |  | Passive |
| Fast |  |  |  |  |  |  |  | Slow |
| Hard worker |  |  |  |  |  |  |  | Apathetic |
| Fun |  |  |  |  |  |  |  | Boring |
| Calm |  |  |  |  |  |  |  | Anxious |
| Agile |  |  |  |  |  |  |  | Clumsy |
